# Supplementary material
Source: Elsevier journal article supplement (https://comptes-rendus.academie-sciences.fr/chimie/article/10.1016/j.crci.2012.12.006/file/attach/mmc1.pdf)

# checkCIF/PLATON report

You have not supplied any structure factors. As a result the full set of tests cannot be run.

No syntax errors found.      CIF dictionary      Interpreting this report

## Datablock: compound\_2

---

Bond precision:    C-C = 0.0049 A                      Wavelength=0.71073

Cell:                      a=11.6289(7)              b=6.6998(5)              c=18.6130(11)  
                                    alpha=90                      beta=90                      gamma=90

Temperature:              115 K

|                        | Calculated                 | Reported                   |
|------------------------|----------------------------|----------------------------|
| Volume                 | 1450.16(16)                | 1450.16(16)                |
| Space group            | P n m a                    | P n m a                    |
| Hall group             | -P 2ac 2n                  | -P 2ac 2n                  |
| Moiety formula         | C13 H10 N, C F3 O3 S, H2 O | C13 H10 N, C F3 O3 S, H2 O |
| Sum formula            | C14 H12 F3 N O4 S          | C14 H12 F3 N O4 S          |
| Mr                     | 347.32                     | 347.31                     |
| Dx,g cm <sup>-3</sup>  | 1.591                      | 1.591                      |
| Z                      | 4                          | 4                          |
| Mu (mm <sup>-1</sup> ) | 0.277                      | 0.277                      |
| F000                   | 712.0                      | 712.0                      |
| F000'                  | 713.00                     |                            |
| h,k,lmax               | 15,8,24                    | 14,8,24                    |
| Nref                   | 1812                       | 1740                       |
| Tmin,Tmax              | 0.984,0.986                | 0.870,1.107                |
| Tmin'                  | 0.933                      |                            |

Correction method= MULTI-SCAN

Data completeness= 0.960                      Theta(max)= 27.510

R(reflections)= 0.0487( 1360)              wR2(reflections)= 0.1013( 1740)

S = 1.143                      Npar= 133

---

The following ALERTS were generated. Each ALERT has the format

**test-name\_ALERT\_alert-type\_alert-level.**

Click on the hyperlinks for more details of the test.

---

### Alert level C

|                                                        |       |       |            |
|--------------------------------------------------------|-------|-------|------------|
| PLAT029_ALERT_3_C _diffrn_measured_fraction_theta_full | Low   | ..... | 0.960      |
| PLAT340_ALERT_3_C Low Bond Precision on C-C Bonds      | ..... |       | 0.0049 Ang |

---

● **Alert level G**

PLAT005\_ALERT\_5\_G No \_iucr\_refine\_instructions\_details in the CIF ?  
PLAT007\_ALERT\_5\_G Note: Number of Unrefined D-H Atoms ..... 2

---

0 **ALERT level A** = Most likely a serious problem - resolve or explain  
0 **ALERT level B** = A potentially serious problem, consider carefully  
2 **ALERT level C** = Check. Ensure it is not caused by an omission or oversight  
2 **ALERT level G** = General information/check it is not something unexpected

0 ALERT type 1 CIF construction/syntax error, inconsistent or missing data  
0 ALERT type 2 Indicator that the structure model may be wrong or deficient  
2 ALERT type 3 Indicator that the structure quality may be low  
0 ALERT type 4 Improvement, methodology, query or suggestion  
2 ALERT type 5 Informative message, check

---

## Datablock: compound\_3

---

Bond precision: C-C = 0.0022 Å                      Wavelength=0.71073

Cell:                      a=7.0899(3)                      b=9.6716(4)                      c=10.5407(4)  
                            alpha=74.269(2)                      beta=78.855(2)                      gamma=81.869(2)  
Temperature:              115 K

|                | Calculated           | Reported             |
|----------------|----------------------|----------------------|
| Volume         | 679.55(5)            | 679.55(5)            |
| Space group    | P -1                 | P -1                 |
| Hall group     | -P 1                 | -P 1                 |
| Moiety formula | C13 H10 N, C F3 O3 S | C13 H10 N, C F3 O3 S |
| Sum formula    | C14 H10 F3 N O3 S    | C14 H10 F3 N O3 S    |
| Mr             | 329.30               | 329.29               |
| Dx, g cm-3     | 1.609                | 1.609                |
| Z              | 2                    | 2                    |
| Mu (mm-1)      | 0.286                | 0.286                |
| F000           | 336.0                | 336.0                |
| F000'          | 336.48               |                      |
| h,k,lmax       | 9,12,13              | 9,12,13              |
| Nref           | 3109                 | 3074                 |
| Tmin,Tmax      | 0.956,0.972          |                      |
| Tmin'          | 0.939                |                      |

Correction method= Not given

Data completeness= 0.989                      Theta(max)= 27.470

R(reflections)= 0.0388( 2852)                      wR2(reflections)= 0.1018( 3074)

S = 1.104                      Npar= 199

---

The following ALERTS were generated. Each ALERT has the format

**test-name\_ALERT\_alert-type\_alert-level.**

Click on the hyperlinks for more details of the test.

---

● **Alert level C**

PLAT250\_ALERT\_2\_C Large U3/U1 Ratio for Average U(i,j) Tensor .... 2.3

---

● **Alert level G**

PLAT005\_ALERT\_5\_G No \_iucr\_refine\_instructions\_details in the CIF ?  
PLAT007\_ALERT\_5\_G Note: Number of Unrefined D-H Atoms ..... 1  
PLAT154\_ALERT\_1\_G The su's on the Cell Angles are Equal ..... 0.00200 Deg.  
PLAT720\_ALERT\_4\_G Number of Unusual/Non-Standard Labels ..... 1

---

0 **ALERT level A** = Most likely a serious problem - resolve or explain  
0 **ALERT level B** = A potentially serious problem, consider carefully  
1 **ALERT level C** = Check. Ensure it is not caused by an omission or oversight  
4 **ALERT level G** = General information/check it is not something unexpected

1 ALERT type 1 CIF construction/syntax error, inconsistent or missing data  
1 ALERT type 2 Indicator that the structure model may be wrong or deficient  
0 ALERT type 3 Indicator that the structure quality may be low  
1 ALERT type 4 Improvement, methodology, query or suggestion  
2 ALERT type 5 Informative message, check

---

## Datablock: compound\_4

---

Bond precision: C-C = 0.0031 A

Wavelength=0.71073

Cell: a=9.0072(4) b=10.1453(4) c=11.2361(5)  
alpha=69.110(2) beta=81.158(2) gamma=69.894(2)  
Temperature: 115 K

|                | Calculated                            | Reported                              |
|----------------|---------------------------------------|---------------------------------------|
| Volume         | 900.24(7)                             | 900.24(7)                             |
| Space group    | P -1                                  | P -1                                  |
| Hall group     | -P 1                                  | -P 1                                  |
| Moiety formula | C13 H10 N, 0.5(C14 H10), C<br>F3 O3 S | C13 H10 N, 0.5(C14 H10), C<br>F3 O3 S |
| Sum formula    | C21 H15 F3 N O3 S                     | C21 H15 F3 N O3 S                     |
| Mr             | 418.41                                | 418.40                                |
| Dx,g cm-3      | 1.544                                 | 1.544                                 |
| Z              | 2                                     | 2                                     |
| Mu (mm-1)      | 0.234                                 | 0.234                                 |
| F000           | 430.0                                 | 430.0                                 |
| F000'          | 430.51                                |                                       |
| h,k,lmax       | 11,13,14                              | 11,13,14                              |
| Nref           | 4124                                  | 4074                                  |
| Tmin,Tmax      | 0.978,0.988                           | 0.813,1.223                           |
| Tmin'          | 0.906                                 |                                       |

Correction method= MULTI-SCAN

Data completeness= 0.988                      Theta(max)= 27.480

R(reflections)= 0.0471( 3466)              wR2(reflections)= 0.1085( 4074)

S = 1.062                                      Npar= 262

The following ALERTS were generated. Each ALERT has the format

**test-name\_ALERT\_alert-type\_alert-level.**

Click on the hyperlinks for more details of the test.

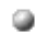

### Alert level G

PLAT005\_ALERT\_5\_G No \_iucr\_refine\_instructions\_details in the CIF                      ?  
 PLAT007\_ALERT\_5\_G Note: Number of Unrefined D-H Atoms .....                      1  
 PLAT154\_ALERT\_1\_G The su's on the Cell Angles are Equal .....                      0.00200 Deg.

- 0 **ALERT level A** = Most likely a serious problem - resolve or explain
  - 0 **ALERT level B** = A potentially serious problem, consider carefully
  - 0 **ALERT level C** = Check. Ensure it is not caused by an omission or oversight
  - 3 **ALERT level G** = General information/check it is not something unexpected
- 
- 1 ALERT type 1 CIF construction/syntax error, inconsistent or missing data
  - 0 ALERT type 2 Indicator that the structure model may be wrong or deficient
  - 0 ALERT type 3 Indicator that the structure quality may be low
  - 0 ALERT type 4 Improvement, methodology, query or suggestion
  - 2 ALERT type 5 Informative message, check

## checkCIF publication errors

---

● **Alert level G**

PUBL013\_ALERT\_1\_G The `_publ_section_comment` (discussion of study) is missing. This is required for a full paper submission (but is optional for an electronic paper).

PUBL017\_ALERT\_1\_G The `_publ_section_references` section is missing or empty.

---

0 **ALERT level A** = Data missing that is essential or data in wrong format

2 **ALERT level G** = General alerts. Data that may be required is missing

---

## **Publication of your CIF**

You should attempt to resolve as many as possible of the alerts in all categories. Often the minor alerts point to easily fixed oversights, errors and omissions in your CIF or refinement strategy, so attention to these fine details can be worthwhile. In order to resolve some of the more serious problems it may be necessary to carry out additional measurements or structure refinements. However, the nature of your study may justify the reported deviations from journal submission requirements and the more serious of these should be commented upon in the discussion or experimental section of a paper or in the "special\_details" fields of the CIF. *checkCIF* was carefully designed to identify outliers and unusual parameters, but every test has its limitations and alerts that are not important in a particular case may appear. Conversely, the absence of alerts does not guarantee there are no aspects of the results needing attention. It is up to the individual to critically assess their own results and, if necessary, seek expert advice.

If you wish to submit your CIF for publication in Acta Crystallographica Section C or E, you should upload your CIF via the web. If your CIF is to form part of a submission to another IUCr journal, you will be asked, either during electronic submission or by the Co-editor handling your paper, to upload your CIF via our web site.

---

**PLATON version of 05/11/2012; check.def file version of 05/11/2012**

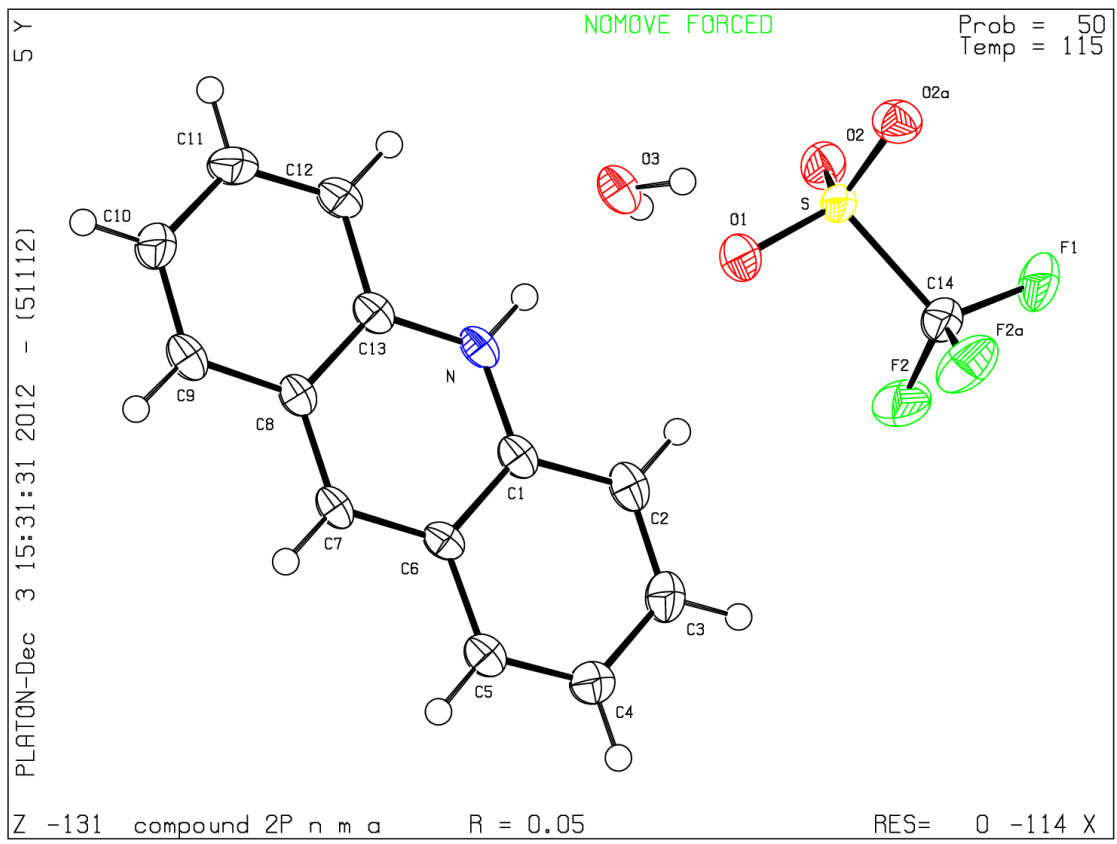

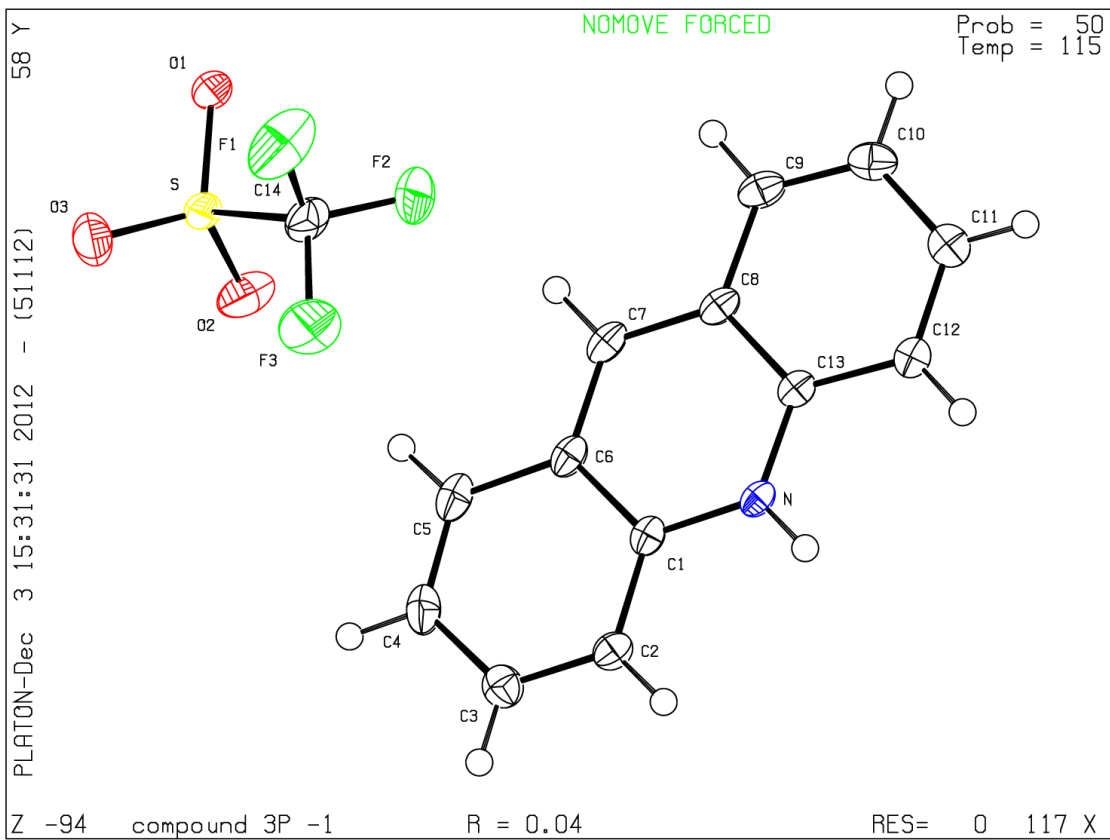

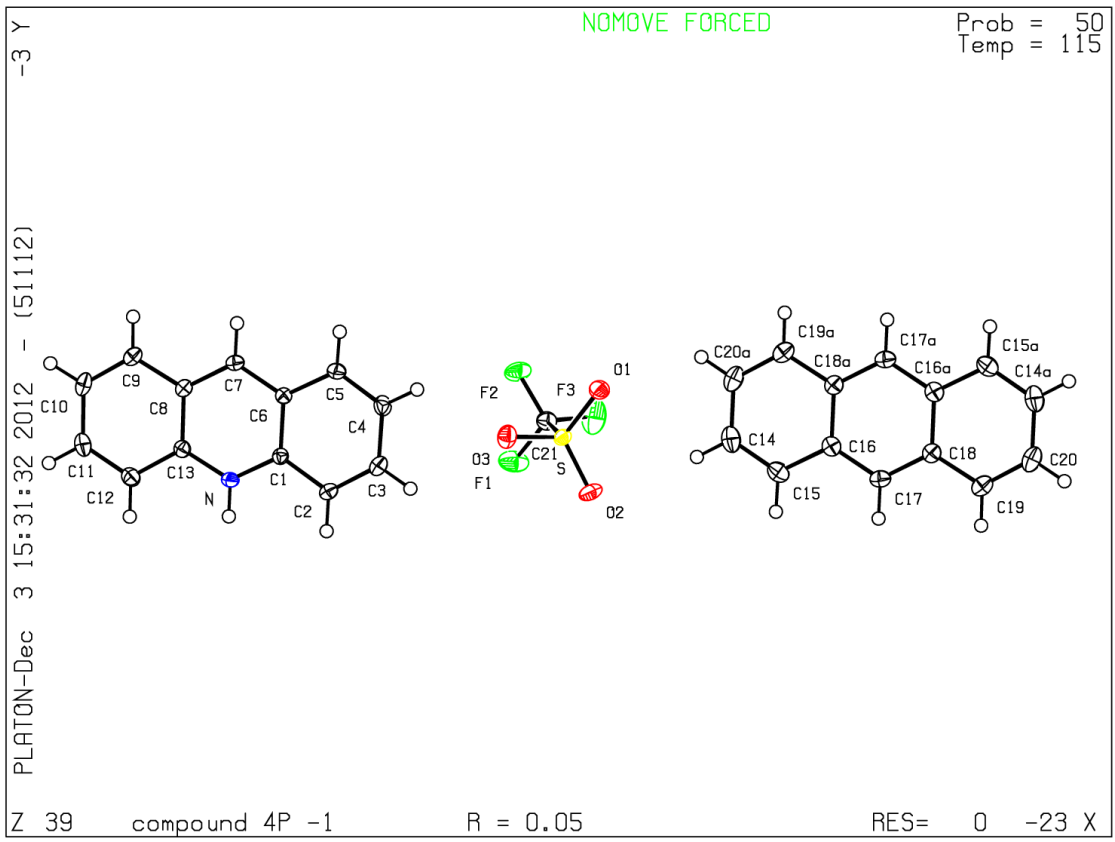

Supplement: mmc1 [file mmc1.pdf]
